# Supplementary material
Source: publisher site journal article supplement (https://www.spandidos-publications.com/3718/downloadSupplementary)
Supplement: Supplementary file 1 [file downloadSupplementary]

## Sheet: Table SⅦ
Table SVII. All differentially expressed genes of GSE144431.
Symbol	log2FC	P-value	Group
hsa_circ_0001588	3.01	3.39X10-3	UP
hsa_circ_0000517	2.96	8.26X10-3	UP
hsa_circ_0092342	2.79	4.24X10-2	UP
hsa_circ_0006156	2.74	1.35X10-3	UP
hsa_circ_0000518	2.55	1.60X10-2	UP
hsa_circ_0000524	2.5	3.02X10-3	UP
hsa_circ_0007148	2.5	2.76X10-3	UP
hsa_circ_0068655	2.47	4.62X10-3	UP
hsa_circ_0008285	2.47	3.89X10-3	UP
hsa_circ_0042268	2.29	5.79X10-3	UP
hsa_circ_0000512	2.26	4.65X10-2	UP
hsa_circ_0008410	2.25	2.63X10-2	UP
hsa_circ_0009361	2.24	1.05X10-2	UP
hsa_circ_0007249	2.23	8.08X10-3	UP
hsa_circ_0014213	2.17	3.18X10-2	UP
hsa_circ_0075445	2.14	8.16X10-3	UP
hsa_circ_0000711	2.11	1.77X10-3	UP
hsa_circ_0001776	2.11	4.55X10-2	UP
hsa_circ_0067991	2.1	8.10X10-3	UP
hsa_circ_0067185	2.08	2.85X10-2	UP
hsa_circ_0046599	2.06	1.07X10-2	UP
hsa_circ_0000514	2.06	4.85X10-2	UP
hsa_circ_0025402	2.04	9.07X10-3	UP
hsa_circ_0052531	2.02	9.70X10-3	UP
hsa_circ_0003408	2	1.20X10-2	UP
hsa_circ_0005297	1.99	9.92X10-3	UP
hsa_circ_0001772	1.93	2.54X10-3	UP
hsa_circ_0083092	1.89	1.73X10-4	UP
hsa_circ_0008934	1.89	9.54X10-3	UP
hsa_circ_0006314	1.88	1.93X10-2	UP
hsa_circ_0005086	1.84	1.47X10-2	UP
hsa_circ_0000515	1.82	2.57X10-2	UP
hsa_circ_0003534	1.81	3.83X10-2	UP
hsa_circ_0005314	1.81	7.69X10-3	UP
hsa_circ_0004121	1.8	3.20X10-2	UP
hsa_circ_0009357	1.79	7.52X10-3	UP
hsa_circ_0089652	1.78	4.55X10-2	UP
hsa_circ_0028072	1.76	2.27X10-2	UP
hsa_circ_0060928	1.75	1.38X10-2	UP
hsa_circ_0061482	1.75	6.01X10-3	UP
hsa_circ_0025946	1.73	5.01X10-3	UP
hsa_circ_0091994	1.72	2.70X10-2	UP
hsa_circ_0087962	1.71	1.67X10-2	UP
hsa_circ_0006956	1.71	7.69X10-4	UP
hsa_circ_0008910	1.67	3.06X10-3	UP
hsa_circ_0001877	1.66	1.99X10-2	UP
hsa_circ_0004868	1.65	1.74X10-3	UP
hsa_circ_0008351	1.65	2.64X10-3	UP
hsa_circ_0001027	1.63	2.79X10-2	UP
hsa_circ_0031235	1.61	6.65X10-3	UP
hsa_circ_0008245	1.6	3.22X10-3	UP
hsa_circ_0008267	1.59	3.66X10-4	UP
hsa_circ_0025513	1.59	1.35X10-2	UP
hsa_circ_0040932	1.57	3.66X10-2	UP
hsa_circ_0087063	1.57	2.48X10-2	UP
hsa_circ_0011450	1.56	5.64X10-3	UP
hsa_circ_0003608	1.55	3.23X10-2	UP
hsa_circ_0063526	1.55	2.87X10-2	UP
hsa_circ_0066290	1.54	3.58X10-2	UP
hsa_circ_0050205	1.53	4.37X10-2	UP
hsa_circ_0006491	1.52	1.21X10-3	UP
hsa_circ_0025016	1.51	3.82X10-2	UP
hsa_circ_0003258	1.51	1.09X10-2	UP
hsa_circ_0005303	1.5	2.86X10-3	UP
hsa_circ_0082600	-1.51	2.53X10-3	DOWN
hsa_circ_0070348	-1.51	7.57X10-4	DOWN
hsa_circ_0008587	-1.51	3.26X10-3	DOWN
hsa_circ_0004313	-1.52	3.74X10-3	DOWN
hsa_circ_0092108	-1.52	1.40X10-2	DOWN
hsa_circ_0008212	-1.54	8.55X10-3	DOWN
hsa_circ_0008676	-1.54	2.13X10-3	DOWN
hsa_circ_0041782	-1.54	2.12X10-3	DOWN
hsa_circ_0071224	-1.54	8.88X10-3	DOWN
hsa_circ_0003599	-1.55	3.97X10-3	DOWN
hsa_circ_0003839	-1.55	1.20X10-3	DOWN
hsa_circ_0017969	-1.55	6.95X10-3	DOWN
hsa_circ_0052523	-1.55	1.30X10-2	DOWN
hsa_circ_0025597	-1.55	4.29X10-3	DOWN
hsa_circ_0072758	-1.57	3.29X10-3	DOWN
hsa_circ_0088807	-1.57	6.87X10-3	DOWN
hsa_circ_0008685	-1.57	1.71X10-3	DOWN
hsa_circ_0046882	-1.57	2.67X10-4	DOWN
hsa_circ_0007140	-1.57	3.36X10-3	DOWN
hsa_circ_0058493	-1.58	1.50X10-2	DOWN
hsa_circ_0026634	-1.58	5.05X10-3	DOWN
hsa_circ_0042691	-1.58	5.66X10-3	DOWN
hsa_circ_0087023	-1.6	4.84X10-3	DOWN
hsa_circ_0006127	-1.6	5.99X10-4	DOWN
hsa_circ_0009244	-1.6	5.62X10-4	DOWN
hsa_circ_0067717	-1.6	6.47X10-3	DOWN
hsa_circ_0004581	-1.61	1.11X10-2	DOWN
hsa_circ_0002928	-1.62	4.24X10-3	DOWN
hsa_circ_0008068	-1.64	8.81X10-3	DOWN
hsa_circ_0011267	-1.64	6.14X10-3	DOWN
hsa_circ_0023691	-1.64	6.61X10-3	DOWN
hsa_circ_0070982	-1.65	2.85X10-3	DOWN
hsa_circ_0082182	-1.66	7.29X10-4	DOWN
hsa_circ_0001855	-1.68	2.48X10-3	DOWN
hsa_circ_0084900	-1.68	1.41X10-2	DOWN
hsa_circ_0007105	-1.69	1.00X10-2	DOWN
hsa_circ_0056530	-1.7	8.71X10-4	DOWN
hsa_circ_0046940	-1.7	3.94X10-2	DOWN
hsa_circ_0034093	-1.71	4.34X10-2	DOWN
hsa_circ_0000167	-1.72	2.00X10-3	DOWN
hsa_circ_0000981	-1.72	2.07X10-2	DOWN
hsa_circ_0007427	-1.72	9.65X10-4	DOWN
hsa_circ_0039914	-1.73	1.06X10-3	DOWN
hsa_circ_0006845	-1.74	7.99X10-5	DOWN
hsa_circ_0044885	-1.76	1.10X10-4	DOWN
hsa_circ_0002056	-1.76	2.21X10-3	DOWN
hsa_circ_0043284	-1.77	1.38X10-3	DOWN
hsa_circ_0091710	-1.77	5.57X10-3	DOWN
hsa_circ_0036188	-1.78	7.19X10-3	DOWN
hsa_circ_0002886	-1.82	7.63X10-3	DOWN
hsa_circ_0018814	-1.83	7.00X10-4	DOWN
hsa_circ_0080719	-1.83	2.44X10-3	DOWN
hsa_circ_0007582	-1.83	6.12X10-4	DOWN
hsa_circ_0006691	-1.83	6.63X10-4	DOWN
hsa_circ_0074559	-1.84	5.80X10-4	DOWN
hsa_circ_0034325	-1.85	6.98X10-3	DOWN
hsa_circ_0082139	-1.86	1.66X10-4	DOWN
hsa_circ_0000357	-1.87	4.10X10-3	DOWN
hsa_circ_0009725	-1.88	4.63X10-3	DOWN
hsa_circ_0001788	-1.9	7.67X10-3	DOWN
hsa_circ_0016404	-1.91	7.57X10-3	DOWN
hsa_circ_0007418	-1.92	1.77X10-4	DOWN
hsa_circ_0028198	-1.95	1.92X10-3	DOWN
hsa_circ_0000968	-1.96	5.64X10-3	DOWN
hsa_circ_0086242	-1.97	4.65X10-4	DOWN
hsa_circ_0008912	-1.99	6.97X10-4	DOWN
hsa_circ_0025249	-2	1.00X10-2	DOWN
hsa_circ_0014094	-2.01	1.33X10-3	DOWN
hsa_circ_0008554	-2.02	1.28X10-3	DOWN
hsa_circ_0074306	-2.1	4.96X10-3	DOWN
hsa_circ_0027446	-2.11	1.08X10-2	DOWN
hsa_circ_0092371	-2.13	4.81X10-3	DOWN
hsa_circ_0092290	-2.17	2.76X10-3	DOWN
hsa_circ_0003249	-2.22	1.04X10-3	DOWN
hsa_circ_0057691	-2.4	4.09X10-4	DOWN
hsa_circ_0090069	-2.58	1.12X10-3	DOWN
hsa_circ_0005073	-2.64	6.53X10-5	DOWN
hsa_circ_0092291	-2.86	7.23X10-4	DOWN
